# Supplementary material
Source: publisher figshare collection journal article supplement (https://gsajournals.figshare.com/articles/dataset/_/12689318)
Supplement: Supplementary file 2 [file 1]

Table S1

List of direct targets of Yki whose transcripts are up/down-regulated in the wing discs of *ap-GAL4/UAS-NelfA<sup>RNAi</sup>*; UAS-Yki

| Upregulated in <i>ap-GAL4/UAS-NelfA<sup>RNAi</sup></i> ; UAS-Yki |                   | Down-regulated in <i>ap-GAL4/UAS-NelfA<sup>RNAi</sup></i> ; UAS-Yki |                     |                  |             |
|------------------------------------------------------------------|-------------------|---------------------------------------------------------------------|---------------------|------------------|-------------|
| <i>aru</i>                                                       | <i>fru</i>        | <i>Actn</i>                                                         | <i>CG6770</i>       | <i>kek5</i>      | <i>simj</i> |
| <i>Bsg</i>                                                       | <i>ft</i>         | <i>Akap200</i>                                                      | <i>CG7065</i>       | <i>klu</i>       | <i>siz</i>  |
| <i>cbt</i>                                                       | <i>ftz-f1</i>     | <i>alt</i>                                                          | <i>CG7272</i>       | <i>knrl</i>      | <i>Sk2</i>  |
| <i>CG10075</i>                                                   | <i>Gelc</i>       | <i>Amun</i>                                                         | <i>CG7914</i>       | <i>ko</i>        | <i>smt3</i> |
| <i>CG10462</i>                                                   | <i>GlyP</i>       | <i>Argk</i>                                                         | <i>CG8243</i>       | <i>l(2)03659</i> | <i>sn</i>   |
| <i>CG10628</i>                                                   | <i>GlyS</i>       | <i>Atpalpha</i>                                                     | <i>CG8498</i>       | <i>lama</i>      | <i>sns</i>  |
| <i>CG10914</i>                                                   | <i>l(3)02640</i>  | <i>bchs</i>                                                         | <i>CG9331</i>       | <i>LanB1</i>     | <i>SppL</i> |
| <i>CG11360</i>                                                   | <i>Lasp</i>       | <i>bowl</i>                                                         | <i>CG9650</i>       | <i>LpR2</i>      | <i>svp</i>  |
| <i>CG11658</i>                                                   | <i>MFS17</i>      | <i>brat</i>                                                         | <i>CG9663</i>       | <i>Lrt</i>       | <i>tio</i>  |
| <i>CG12065</i>                                                   | <i>mTerf3</i>     | <i>caup</i>                                                         | <i>chic</i>         | <i>Lsp1alpha</i> | <i>tsh</i>  |
| <i>CG13185</i>                                                   | <i>mthl1</i>      | <i>CG10237</i>                                                      | <i>chm</i>          | <i>mam</i>       | <i>tup</i>  |
| <i>CG13398</i>                                                   | <i>Mys45A</i>     | <i>CG10960</i>                                                      | <i>CrebA</i>        | <i>Mhcl</i>      | <i>tutl</i> |
| <i>CG13893</i>                                                   | <i>neb</i>        | <i>CG11050</i>                                                      | <i>cv-d</i>         | <i>modSP</i>     | <i>vri</i>  |
| <i>CG14322</i>                                                   | <i>Nrg</i>        | <i>CG12769</i>                                                      | <i>CycE</i>         | <i>msi</i>       | <i>wit</i>  |
| <i>CG1648</i>                                                    | <i>nrv2</i>       | <i>CG13875</i>                                                      | <i>Dh31-R</i>       | <i>mtd</i>       |             |
| <i>CG2247</i>                                                    | <i>NTPase</i>     | <i>CG15628</i>                                                      | <i>DOR</i>          | <i>mth</i>       |             |
| <i>CG2540</i>                                                    | <i>Phb2</i>       | <i>CG17684</i>                                                      | <i>dpr16</i>        | <i>Mvl</i>       |             |
| <i>CG2875</i>                                                    | <i>Ptp10D</i>     | <i>CG31475</i>                                                      | <i>drm</i>          | <i>MYPT-75D</i>  |             |
| <i>CG30069</i>                                                   | <i>Ptp61F</i>     | <i>CG32447</i>                                                      | <i>E(spl)m2-BFM</i> | <i>nrv1</i>      |             |
| <i>CG31635</i>                                                   | <i>qm</i>         | <i>CG3270</i>                                                       | <i>Eip74EF</i>      | <i>nub</i>       |             |
| <i>CG32095</i>                                                   | <i>rau</i>        | <i>CG33129</i>                                                      | <i>Eip75B</i>       | <i>opa</i>       |             |
| <i>CG32365</i>                                                   | <i>S6k</i>        | <i>CG33229</i>                                                      | <i>emc</i>          | <i>path</i>      |             |
| <i>CG32369</i>                                                   | <i>SNF4Agamma</i> | <i>CG3529</i>                                                       | <i>fax</i>          | <i>Pep</i>       |             |
| <i>CG33158</i>                                                   | <i>Socs36E</i>    | <i>CG4020</i>                                                       | <i>Fmr1</i>         | <i>pk</i>        |             |
| <i>CG3838</i>                                                    | <i>spi</i>        | <i>CG42272</i>                                                      | <i>Gale</i>         | <i>Prosbeta7</i> |             |
| <i>CG5059</i>                                                    | <i>Spt</i>        | <i>CG42340</i>                                                      | <i>Gpdh</i>         | <i>Rab5</i>      |             |
| <i>CG6175</i>                                                    | <i>Su(Tpl)</i>    | <i>CG4374</i>                                                       | <i>grp</i>          | <i>Reph</i>      |             |
| <i>CG7841</i>                                                    | <i>Tgt</i>        | <i>CG4562</i>                                                       | <i>Gug</i>          | <i>RnrS</i>      |             |
| <i>CG8360</i>                                                    | <i>Traf4</i>      | <i>CG4615</i>                                                       | <i>hbs</i>          | <i>Rtnl1</i>     |             |
| <i>CG9932</i>                                                    | <i>Tsp39D</i>     | <i>CG5001</i>                                                       | <i>Hnf4</i>         | <i>rump</i>      |             |
| <i>dbe</i>                                                       | <i>uif</i>        | <i>CG5756</i>                                                       | <i>Hr39</i>         | <i>Sb</i>        |             |
| <i>dpp</i>                                                       | <i>Vha26</i>      | <i>CG5758</i>                                                       | <i>Hs6st</i>        | <i>sbb</i>       |             |
| <i>ex</i>                                                        | <i>wg</i>         | <i>CG5885</i>                                                       | <i>Hsp26</i>        | <i>SC35</i>      |             |
| <i>fng</i>                                                       | <i>zormin</i>     | <i>CG6163</i>                                                       | <i>Hsp83</i>        | <i>Sec63</i>     |             |
| <i>for</i>                                                       |                   | <i>CG6287</i>                                                       | <i>kek1</i>         | <i>side</i>      |             |

The genes shown in bold letters are those direct targets of Yki that are upregulated in both non-tumorous *ap>UAS-Yki* discs and tumorous *ap>UAS-Yki; UAS-NelfA<sup>RNAi</sup>* discs, but degree of enhancement was higher in tumorous tissue.
