# Supplementary material
Source: publisher figshare collection journal article supplement (https://gsajournals.figshare.com/articles/dataset/_/12689318)
Supplement: Supplementary file 6 [file 1]

Table 2

| List of genes whose expression is down regulated in the wing discs of <i>ap-GAL4/UAS-NelfA<sup>RNAi</sup></i> ; UAS-Yki |           |                                             |          |
|-------------------------------------------------------------------------------------------------------------------------|-----------|---------------------------------------------|----------|
| Proteasome                                                                                                              |           | Protein processing in endoplasmic reticulum |          |
| Gene name                                                                                                               | logFC     | Gene name                                   | logFC    |
| Rpn7                                                                                                                    | -1.084698 | prtp                                        | -1.46289 |
| Rpn13                                                                                                                   | -0.949757 | Sec61gamma                                  | -1.65593 |
| Rpn2                                                                                                                    | -0.900781 | Sec61beta                                   | -1.31964 |
| Prosalpha3                                                                                                              | -0.910536 | CG5885                                      | -1.28449 |
| Rpn3                                                                                                                    | -0.850895 | Sec61alpha                                  | -1.25184 |
| Rpn1                                                                                                                    | -0.879125 | TRAM                                        | -1.3381  |
| Pomp                                                                                                                    | -0.795409 | Pdi                                         | -1.145   |
| Prosalpha5                                                                                                              | -0.834712 | SsRbeta                                     | -1.23571 |
| Prosbeta4                                                                                                               | -0.76685  | Sec13                                       | -1.01315 |
| Prosbeta7                                                                                                               | -0.717883 | Sec63                                       | -0.97489 |
| Prosbeta2                                                                                                               | -0.706638 | CG14476                                     | -1.03296 |
| Prosbeta5                                                                                                               | -0.687177 | Sec24CD                                     | -0.87522 |
| Prosalpha4                                                                                                              | -0.694159 | Ostgamma                                    | -0.97374 |
| Prosbeta6                                                                                                               | -0.631819 | Ost48                                       | -0.88256 |
| Rpn10                                                                                                                   | -0.592037 | CG4164                                      | -1.21065 |
| Rpn12                                                                                                                   | -0.597364 | ergic53                                     | -0.86625 |
|                                                                                                                         |           | Plap                                        | -0.86843 |
|                                                                                                                         |           | OstStt3                                     | -0.90274 |
|                                                                                                                         |           | Gp93                                        | -0.89197 |
|                                                                                                                         |           | l(1)G0320                                   | -0.88951 |
|                                                                                                                         |           | CG33303                                     | -0.8065  |
|                                                                                                                         |           | Hsc70-3                                     | -0.9493  |
|                                                                                                                         |           | CG5510                                      | -0.81474 |
|                                                                                                                         |           | p47                                         | -0.78553 |
|                                                                                                                         |           | Crc                                         | -0.86323 |
|                                                                                                                         |           | CG6453                                      | -0.81869 |
|                                                                                                                         |           | Sec23                                       | -0.73903 |
|                                                                                                                         |           | ERp60                                       | -0.76882 |
|                                                                                                                         |           | Der-1                                       | -0.80252 |
|                                                                                                                         |           | Csp                                         | -0.64369 |
|                                                                                                                         |           | CaBP1                                       | -0.61193 |
|                                                                                                                         |           | CG1597                                      | -0.67306 |
