# Supplementary material
Source: publisher figshare collection journal article supplement (https://gsajournals.figshare.com/articles/dataset/_/12689318)
Supplement: Supplementary file 7 [file 1]

Table 1

| List of genes whose expression is up-regulated in the wing discs of <i>ap-GAL4/UAS-NelfA<sup>RNAi</sup></i> ; UAS-Yki |          |            |          |                                   |          |
|-----------------------------------------------------------------------------------------------------------------------|----------|------------|----------|-----------------------------------|----------|
| Aminoacyl-tRNA biosynthesis                                                                                           |          | Ribosome   |          | Ribosome biogenesis in eukaryotes |          |
| Gene name                                                                                                             | logFC    | Gene name  | logFC    | Gene name                         | logFC    |
| Slimp                                                                                                                 | 2.124626 | RpL24-like | 1.256082 | Non1                              | 2.292457 |
| Aats-leu                                                                                                              | 1.413973 | RpL5       | 1.202779 | Ns2                               | 0.900983 |
| Aats-thr                                                                                                              | 0.912237 | RpL15      | 1.130382 | RIOK1                             | 1.354352 |
| Aats-cys                                                                                                              | 0.813931 | mRpL28     | 0.969423 | CG12301                           | 0.997310 |
| Aats-tyr-m                                                                                                            | 1.047768 | mRpL9      | 0.799329 | Bka                               | 0.876333 |
| Aats-pro                                                                                                              | 1.07342  | RpS17      | 0.82042  | eIF6                              | 0.745744 |
| Aats-ile                                                                                                              | 0.73741  | mRpL35     | 0.997681 | l(3)72Dn                          | 0.800876 |
| CG4573                                                                                                                | 1.138148 | RpS23      | 0.782542 | CG8064                            | 0.778604 |
| CG1750                                                                                                                | 1.487797 | RpS4       | 0.775449 | Nmd3                              | 0.716537 |
| CG6796                                                                                                                | 0.925494 | RpL27A     | 0.716573 | Mat89Ba                           | 0.713426 |
| CG7441                                                                                                                | 0.884721 | RpL32      | 0.681588 | CG11920                           | 0.750235 |
| CG17259                                                                                                               | 0.726080 | RpL40      | 0.674508 | CG3071                            | 0.713535 |
| Aats-trp                                                                                                              | 0.732224 | RpS29      | 0.743389 | CG33158                           | 0.595732 |
| Aats-aspartic                                                                                                         | 0.747097 | RpL26      | 0.620538 | CG13185                           | 0.823244 |
| Aats-gly                                                                                                              | 0.613889 | mRpL10     | 0.692489 | CG7246                            | 0.798345 |
| CG5463                                                                                                                | 1.037030 | mRpL3      | 0.671734 | CG8549                            | 0.593618 |
| Aats-ala-m                                                                                                            | 0.602770 | RpL35      | 0.631348 |                                   |          |
| CG5660                                                                                                                | 0.663614 | RpL27      | 0.594275 |                                   |          |
|                                                                                                                       |          | RpL28      | 0.629209 |                                   |          |
|                                                                                                                       |          | RpL21      | 0.600412 |                                   |          |
|                                                                                                                       |          | RpL22-like | 1.081389 |                                   |          |
|                                                                                                                       |          | RpS3A      | 0.587288 |                                   |          |
|                                                                                                                       |          | RpL37A     | 0.3662   |                                   |          |
|                                                                                                                       |          | mRpL11     | 0.624297 |                                   |          |
